# Supplementary material for: Improving the Supercapacitance Performance of V 2 O 5 Interconnected Al 2 O 3 Composite Electrode for Energy Storage Application
Source: Research Square preprint supplement (doi:10.21203/rs.3.rs-5216116/v1), 2024-11-27
Supplement: Supplementary file 1 [file b16f32ac82c860ad320354d3.docx]

**Supporting Information**

**Improving the Supercapacitance Performance of V2O5 Interconnected Al2O3 Composite Electrode for Energy Storage Application**

P. Vijayakumara, Gomathi Ab, P. Sivakumarc, P. Maadeswaranb , and N.Sethupathia*****,

a PG and Research Department of Physics, Arignar Anna Government Arts College, Namakkal-637 002 Tamilnadu, India

b Department of Energy Science and Technology, Periyar University, Salem-636 011, Tamilnadu, India

c PG and Research Department of Chemistry, Arignar Anna Government Arts College, Namakkal-637 002 Tamilnadu, India

***Corresponding Author: sethupathin@aagacnkl.edu.in**

**Experimental Section**

**Reagents**

In this work, the experimental chemicals were obtained from Hi-media (INDIA). Ammonium metavanadate (NH4VO3, 99.8 %), citric acid (C6H8O7, 99.5 %), poly ethylene glycol (PEG, 99.5 %), aluminium nitrate nanohydrate (Al(NO3)3.9H2O), acetone and potassium hydroxide (KOH, 99.8 %). A double distilled (DDI) water was utilized in this experiment. A commercially available nickel foams were purchased from local market.

**Synthesis Process of Stacked V2O5 nanosheets**

In this vanadium pentoxide nanosheet preparation process, a 0.5 *mmol (2.91 g)* of Ammonium metavanadate, 0.125 *mmol* *(1.2 g)* of citric acid (1:2 ratio) were dissolved in to 10 ml of polyethylene glycol and stirred at 10 minutes. Further, a 50 ml of distilled water was added on the above solution and allowed to stirred for 3 hours continuously. The obtained solution was poured into 100 ml of stainless-steel Teflon and sealed to leads. After that, the Teflon was kept an electric oven at 180 °C for 12 hours. At end of the experiment, the autoclave was allowed to become cool and the product was centrifugated at several times to get the particles. Then the particle was transferred in an electric oven at 80 °C at overnight to remove the water molecules. Finally, the dried nanoparticles were calcined at 550 °C for 3 hours using with muffle furnace to obtain the V2O5 nanosheets.

**Synthesis Process of Al2O3 nanoparticle**

In this aluminium oxide nanoparticle preparation process, a 0.125 *mmol (4.68 g)* of aluminium nitrate nanohydrate, 0.125 *mmol* *(1.2 g)* of citric acid (1:1 ratio) were dissolved in to 10 ml of polyethylene glycol and stirred for 10 minutes. Further, a 50 ml of distilled water was added on the above solution and allowed to stirred at 3 hours continuously. The white colour obtained solution was poured into 100 ml of stainless-steel Teflon and sealed to leads. After that, the Teflon was kept an electric oven at 160 °C for 12 hours. At end of the experiment, the autoclave was allowed to become cool and the product was centrifugated at several times to get the particles. Then the particle was transferred in an electric oven at 80 °C at overnight to remove the water molecules. Finally, the dried nanoparticles were calcined at 550 °C for 3 hours using with muffle furnace to obtain the Al2O3 nanoparticles.

**Synthesis Process of V2O5/Al2O3 (denoted as VA) nanocomposite**

In this V2O5/Al2O3 composite preparation process, a 0.5 *mmol (2.91 g)* of Ammonium metavanadate, 0.125 *mmol (4.68 g)* of aluminium nitrate nanohydrate, 0.125 *mmol* *(1.2 g)* of citric acid were dissolved in to 10 ml of polyethylene glycol and stirred for 10 minutes. Further, a 50 ml of distilled water was added on the above solution and allowed to stirred at 3 hours continuously. The obtained solution was poured into 100 ml of stainless-steel Teflon and sealed to leads. After that, the Teflon was kept an electric oven at 180 °C for 12 hours. At end of the experiment, the autoclave was allowed to become cool and the product was centrifugated at several times to get the particles. Then the particle was transferred in an electric oven at 80 °C at overnight to remove the water molecules. Finally, the dried nanoparticles were calcined at 550 °C for 3 hours using with muffle furnace to obtain the V2O5/Al2O3 (denoted as VA) nanocomposite.

**Material Characterization**

The structural analysis of V2O5, Al2O3 and V2O5/Al2O3 materials was conducted using an X-ray diffractometer (XRD) with Cu-Kα radiations (wavelength λ=1.5406°A) (System Ultima IV of Rigaku Corporation, Japan). Chemical bonding was investigated using Fourier transform infrared (FTIR) spectra recorded on a JASCO 410 model. XPS was used to determine the chemical composition and oxidation states of the sample materials using a K-alpha X-ray photoelectron spectrometer microprobe from Thermo VG in the UK. The flm surface morphology was examined using a FESEM from JEOL JSM-6360, Mira-3, Tescan, Brno, Czech Republic.

**Electrochemical Characterization**

The prepared V2O5, Al2O3 and V2O5/Al2O3 powder (80%) was combined in an N-methyl-2-pyrrolidone solvent containing a PVdF (10%) binder, with 10% (Carbon black) added as a conductive agent. The resulting mixture was homogenized with a mortar and pestle to form a slurry. The slurry was coated on conducting Ni foam (39BC), which served as a current collector, and then dried in an oven at 80 °C for 2 hours to evaporate the solvent. Electrochemical investigations were carried out utilizing a three-electrode setup in an aqueous 1 M KOH electrolyte, which serving as the working electrode, Pt wire as the counter electrode, and a saturated calomel electrode (SCE) as the reference electrode. The specific capacitance of V2O5, Al2O3 and V2O5/Al2O3 electrode was estimated using the following equation based on the three-electrode cell GCD curve.

Cs = ……. F/g ……… (1)

Where, *I* denotes the applied current (A) in the GCD, m denotes the mass of the active material (g), *V* and *t* represents the working potential window (V) and discharge time (s).
